# Supplementary material for: The carnivorous digestive system and bamboo diet of giant pandas may shape their low gut bacterial diversity
Source: PubMed Central journal article supplement (PMC7066643; doi:10.1093/conphys/coz104), 2020-03-13

Figure S5

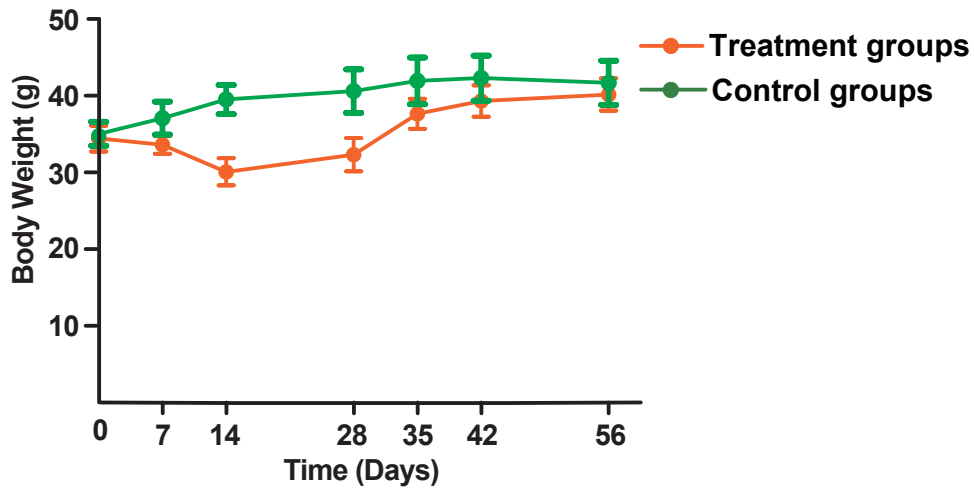

Supplement: figure_s5_coz104.pdf [file figure_s5_coz104.pdf]
